# Supplementary material for: A systematic review and dose-response meta-analysis of sleep duration and the occurrence of cognitive disorders
Source: Springer Nature journal article supplement (doi:10.1007/s11325-017-1527-0), 2017-06-06
Supplement: MOESM3 [file 13344312]

| **Supplementary table 3** Subgroup analysis of the association between sleep duration category and the incident risk of cognitive disorders. | | | | |
| --- | --- | --- | --- | --- |
| Outcome | Comparison, No. | RR (95% CI) | | |
| Shortest vs. middle |  | Longest vs. middle |
| Total | 12 | 1.34 (1.15, 1.56) |  | 1.21 (1.06, 1.39) |
| Race |  |  |  |  |
| Asian | 1 | 1.92 (1.08, 3.43) |  | 1.64 (0.33, 8.16) |
| Caucasian | 11 | 1.34 (1.15, 1.55) |  | 1.21 (1.06, 1.38) |
| P-value for difference |  | 0.338 |  | 0.764 |
| Gender |  |  |  |  |
| Male | 2 | 1.74 (0.77, 3.93) |  | 0.78 (0.24, 2.60) |
| Female | 5 | 1.23 (1.02, 1.50) |  | 1.20 (1.00, 1.43) |
| Both sexes | 5 | 1.78 (1.34, 2.38) |  | 1.70 (1.21, 2.38) |
| P-value for difference |  | 0.342 |  | 0.077 |
| Duration of follow-up (yrs) |  |  |  |  |
| <10 | 10 | 1.33 (1.12, 1.56) |  | 1.21 (1.03, 1.39) |
| ≥10 | 2 | 1.71 (1.19, 2.47) |  | 1.57 (1.05, 2.33) |
| P-value for difference |  | 0.299 |  | 0.278 |
| Number of participants |  |  |  |  |
| <3000 | 8 | 1.43 (1.10, 1.87) |  | 1.22 (0.94, 1.58) |
| ≥3000 | 4 | 1.37 (1.20, 1.55) |  | 1.21 (1.02, 1.43) |
| P-value for difference |  | 0.966 |  | 0.765 |
| Data collection of sleep duration |  |  |  |  |
| Self-reported | 10 | 1.45 (1.28, 1.63) |  | 1.31 (1.14, 1.51) |
| Objectively measured | 2 | 1.01 (0.70, 1.46) |  | 0.98 (0.76, 1.25) |
| P-value for difference |  | 0.018 |  | 0.070 |
| Pattern of sleep duration |  |  |  |  |
| 24-hour | 6 | 1.22 (0.94, 1.56) |  | 1.29 (0.98, 1.71) |
| Night | 6 | 1.46 (1.26, 1.71) |  | 1.20 (1.03, 1.39) |
| P-value for difference |  | 0.163 |  | 0.873 |
| RR, relative risk; CI, confidence interval | | | | |
